# Supplementary material for: Determination of variable region sequences from hybridoma immunoglobulins that target Mycobacterium tuberculosis virulence factors
Source: PubMed Central journal article supplement (PMC8378720; doi:10.1371/journal.pone.0256079), 2021-08-20
Supplement: pone.0256079.s018.pdf [file pone.0256079.s018.pdf]

# Figures with Original blots

Determination of Variable Region Sequences from  
Hybridoma Immunoglobulins that Target  
*Mycobacterium tuberculosis* Virulence Factors

Hui-Chen Chang Foreman, Andrew Frank, and Timothy T. Stedman

BEI Resources, ATCC. 10801 University Boulevard, Manassas, VA 20110-2209

# Final Fig 1B

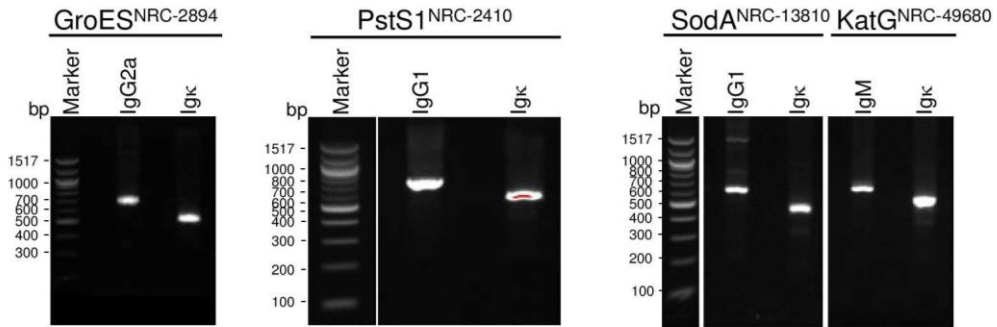

## Original gel/blot pictures

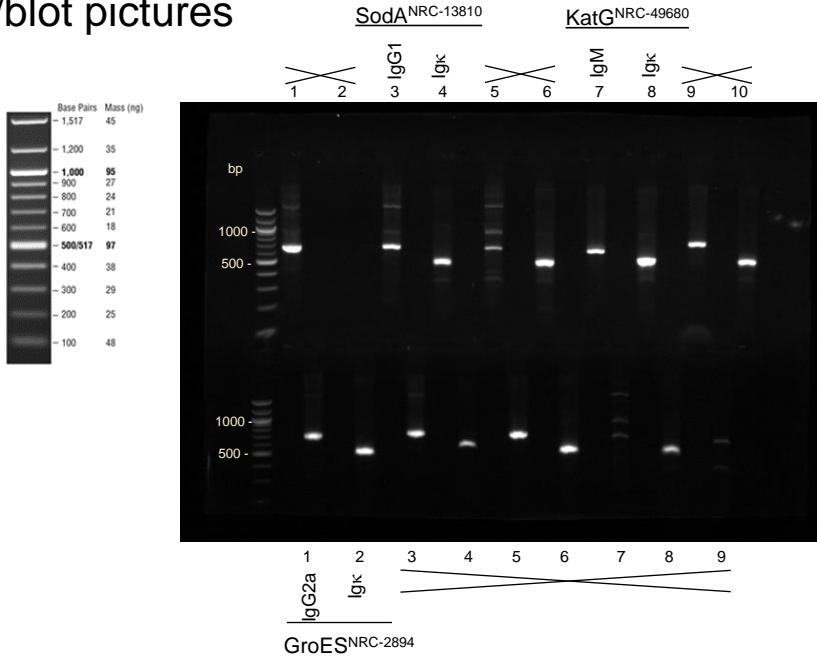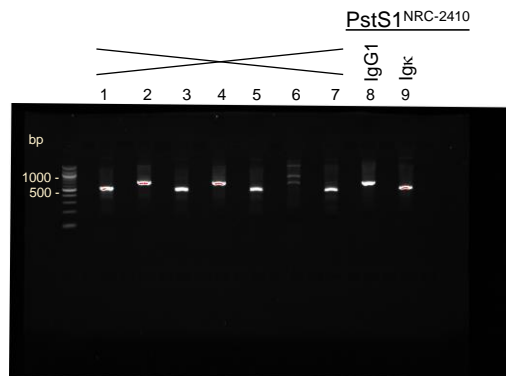

# Final Fig 3B

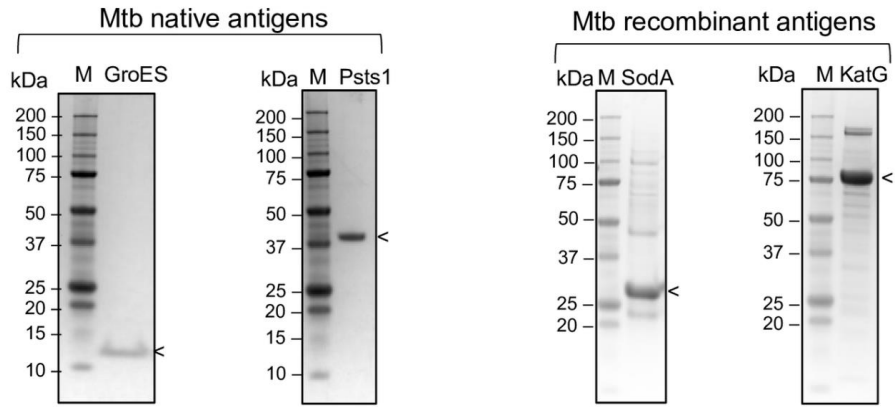

## Original gel/blot pictures

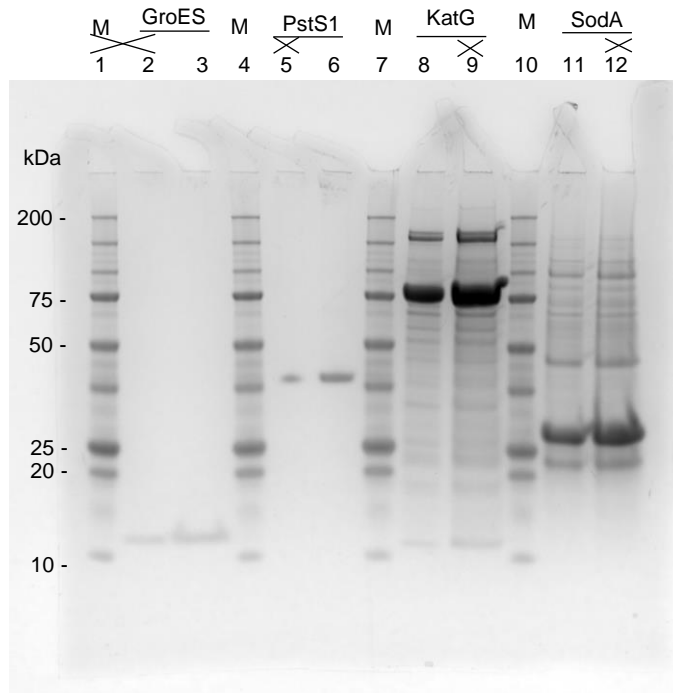

# Final Fig 3C & D

C.

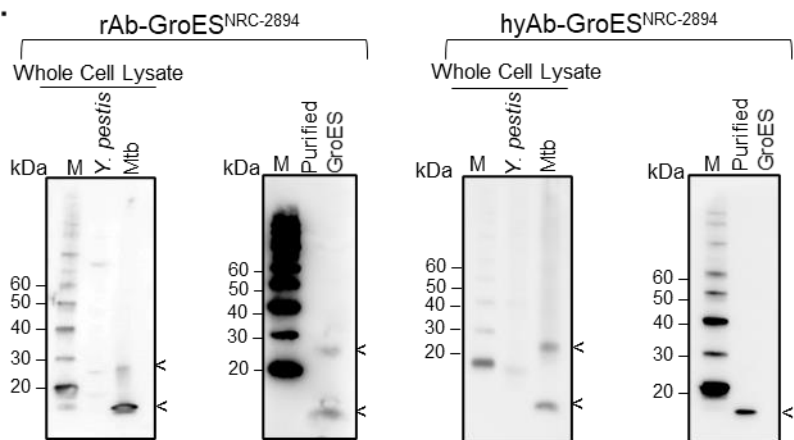

D.

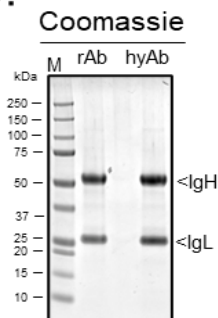

## Original gel/blot pictures

C.

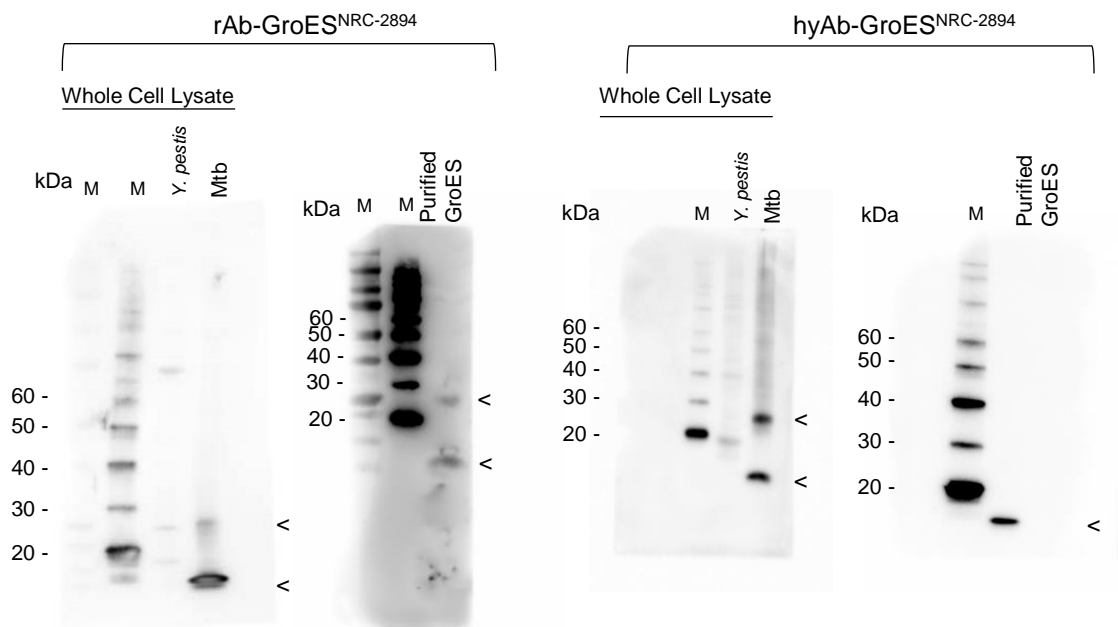

D.

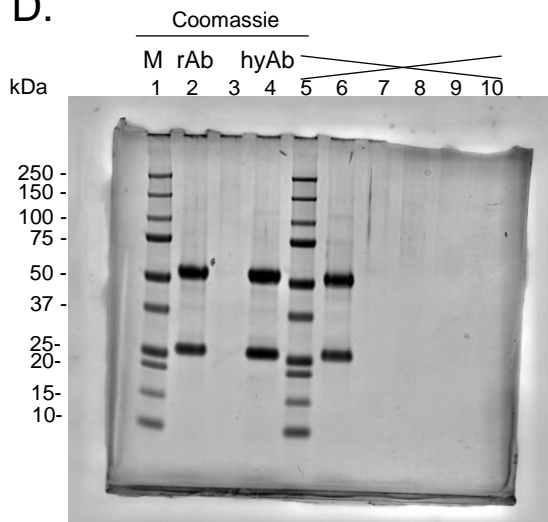

# Final Fig 4A

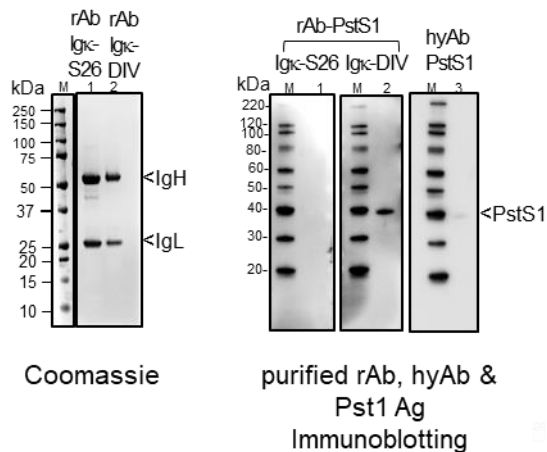

## Original gel/blot pictures

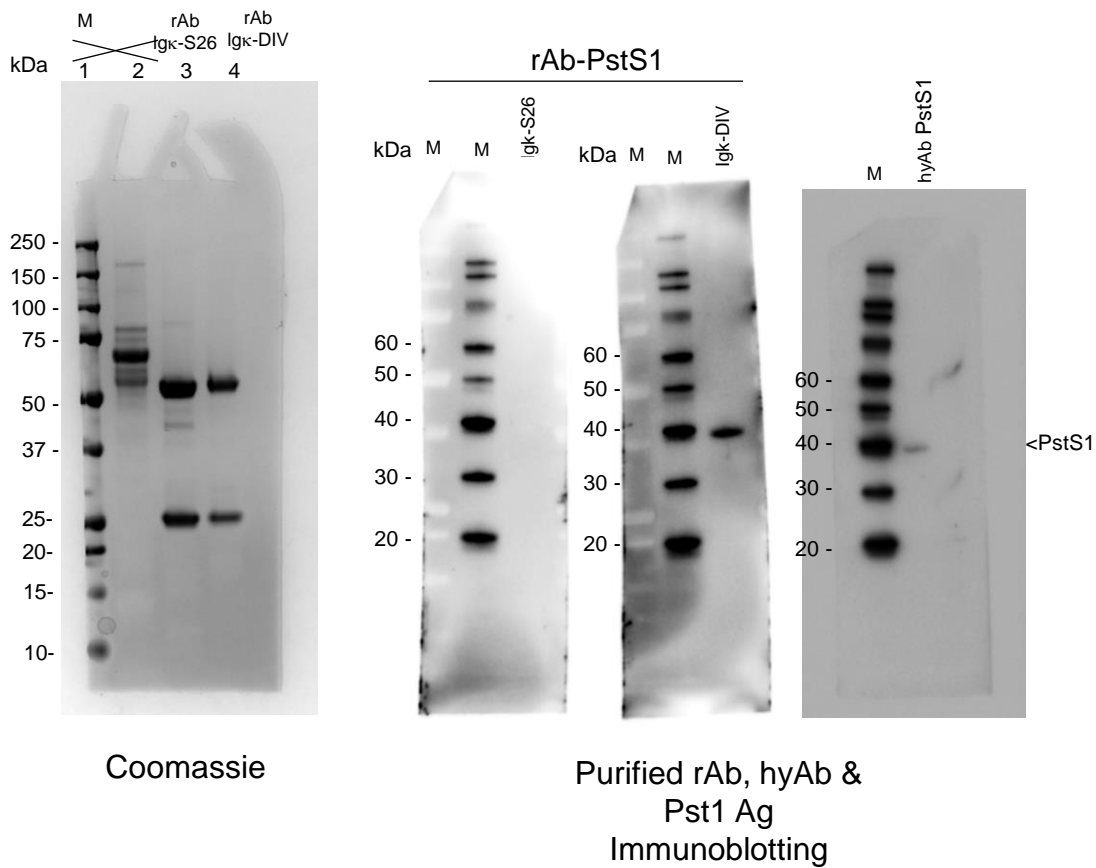

# Final Fig 4B

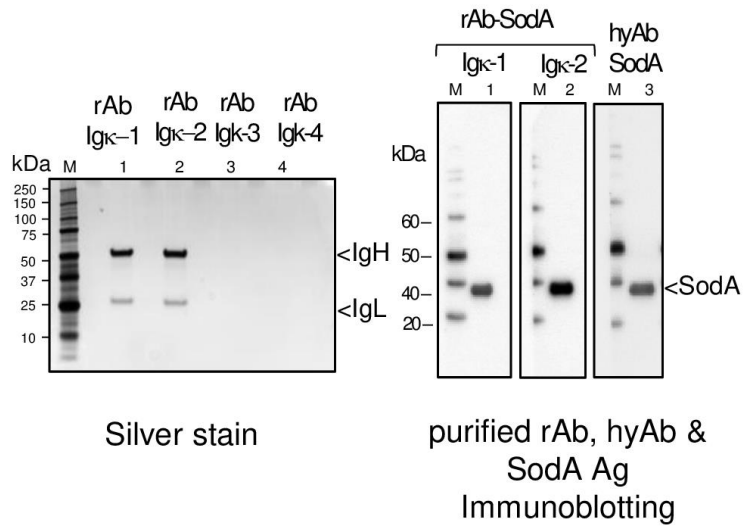

# Original gel/blot pictures

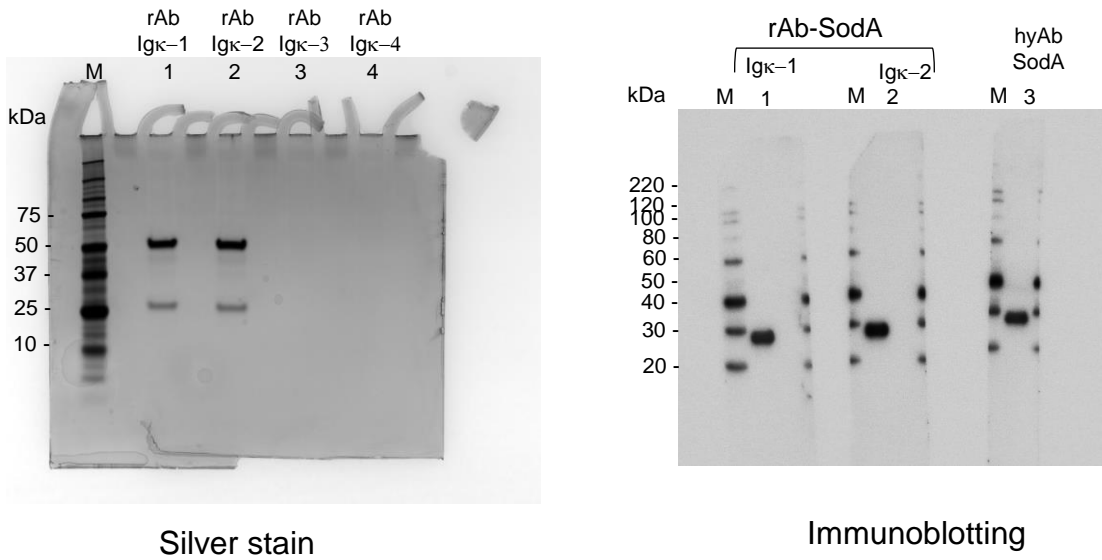

# Final Fig 4C

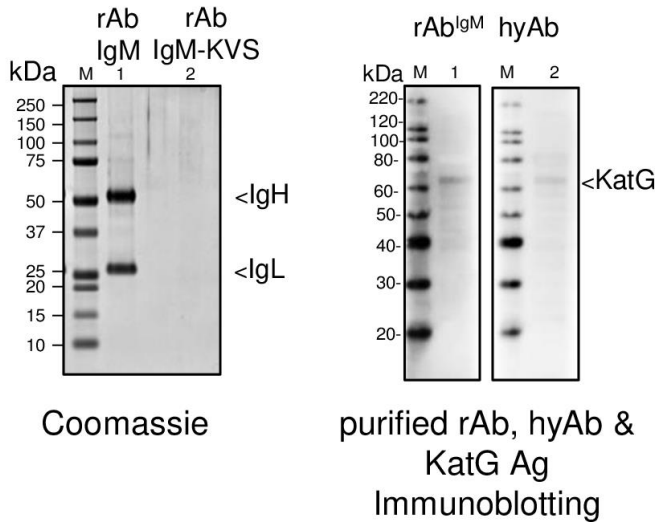

## Original gel/blot pictures

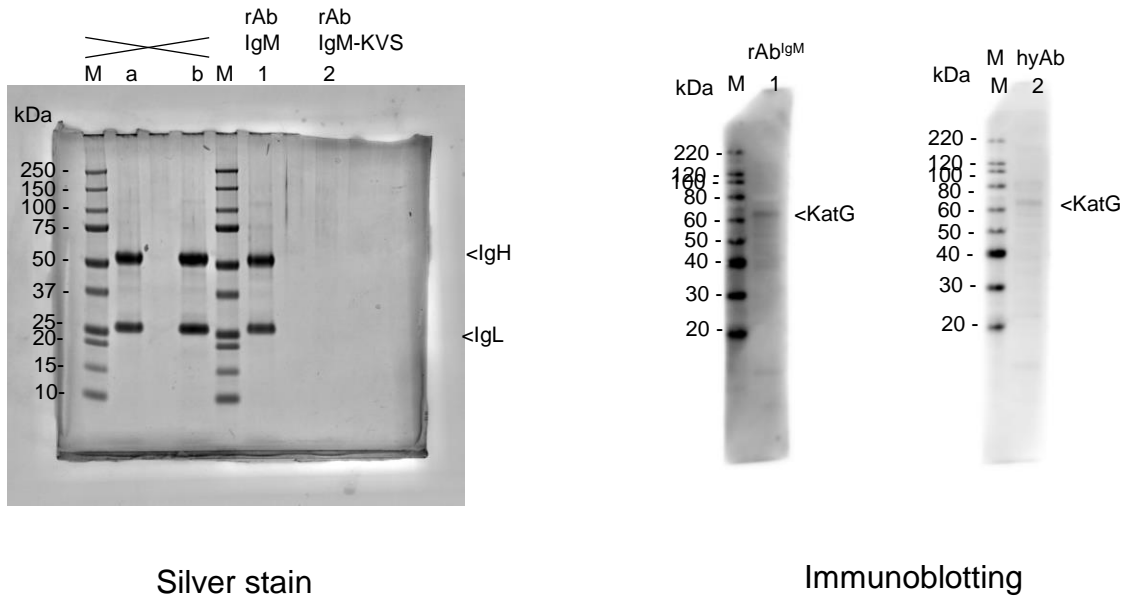

Supplemental



# Final Fig 1s-C

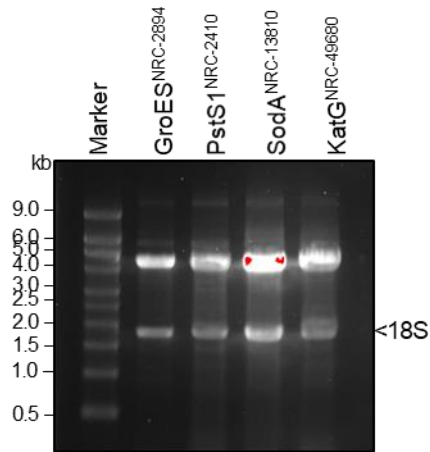

# Original gel/blot pictures

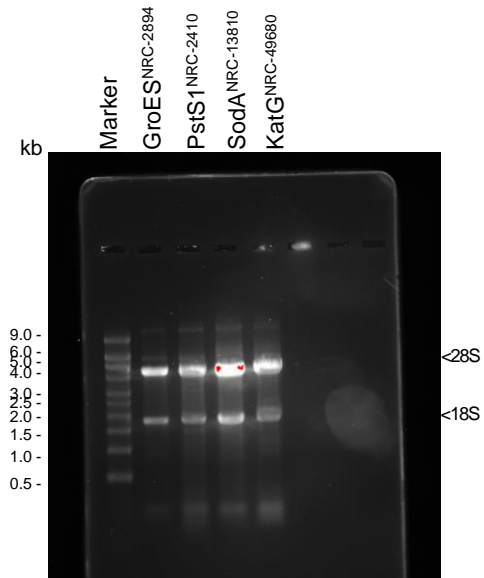

# Final Fig 1s-D

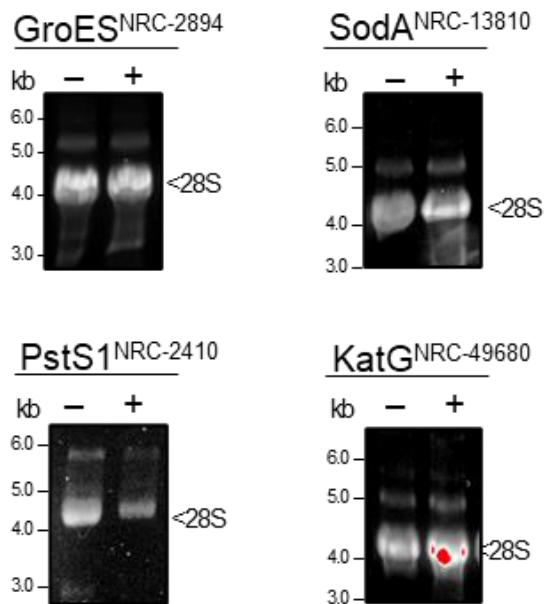

## Original gel/blot pictures

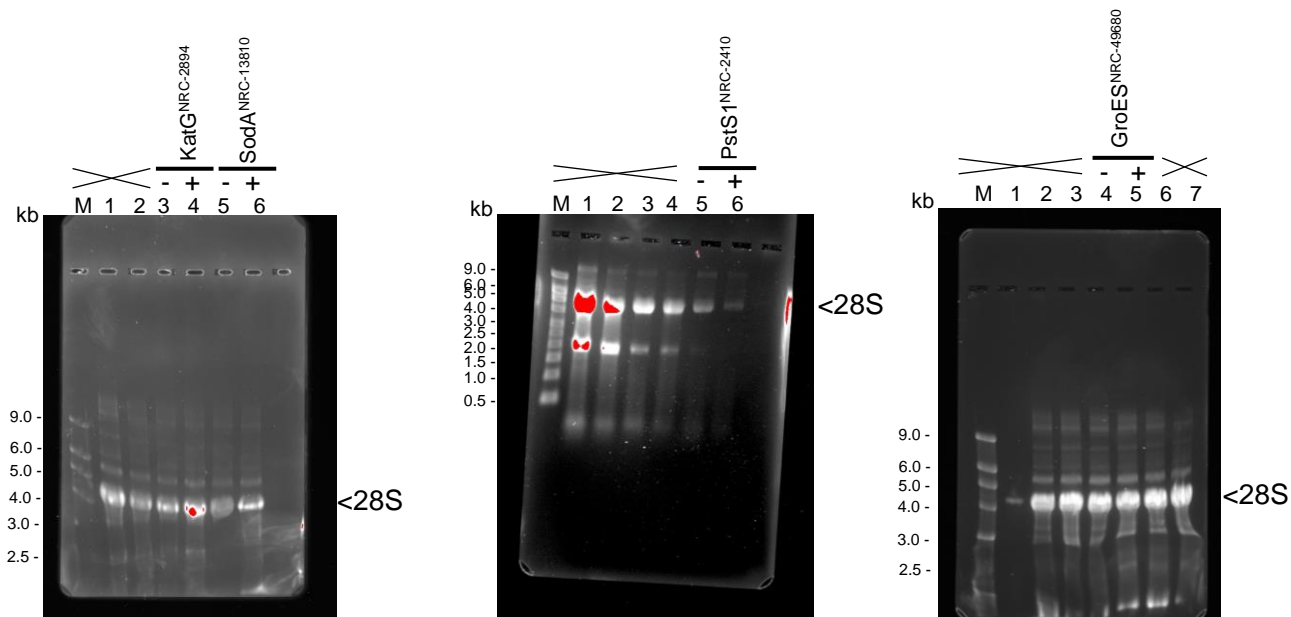

# Final Fig 3s

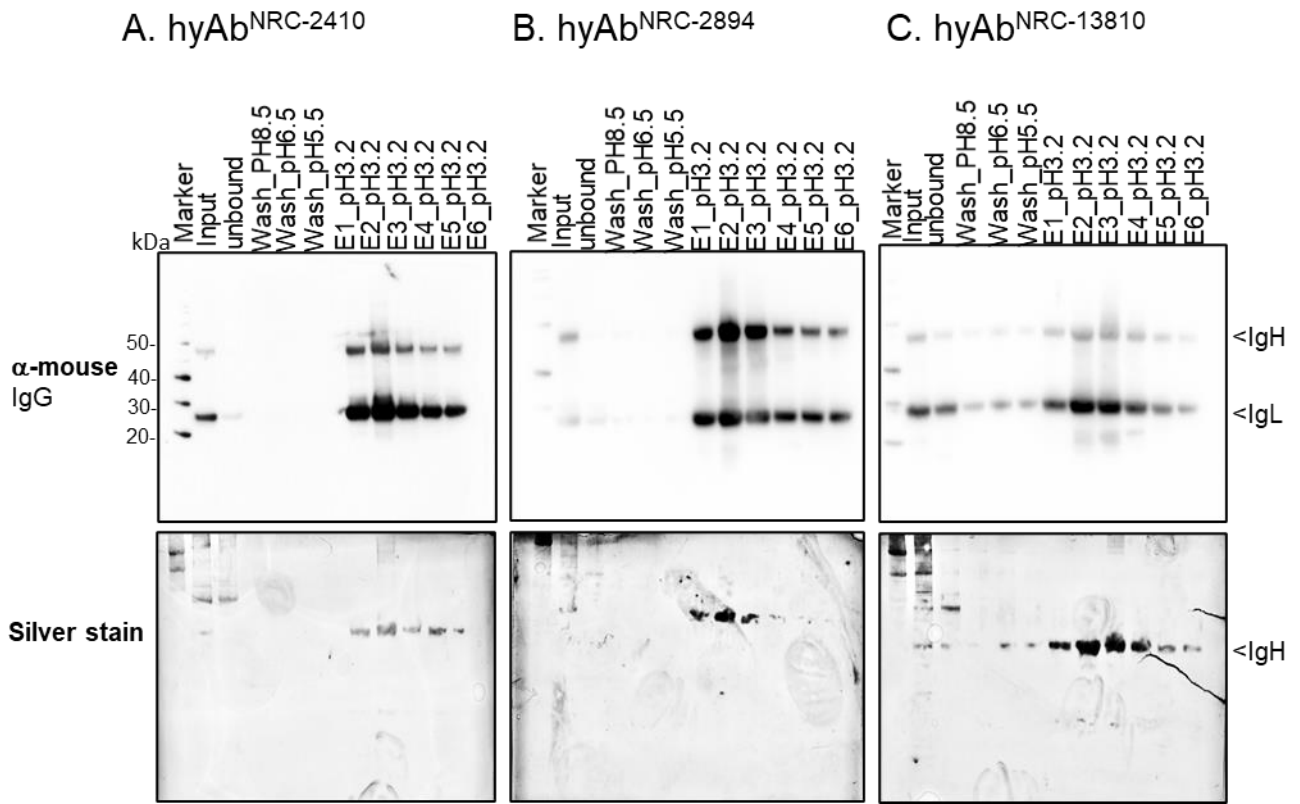

## Original gel/blot pictures

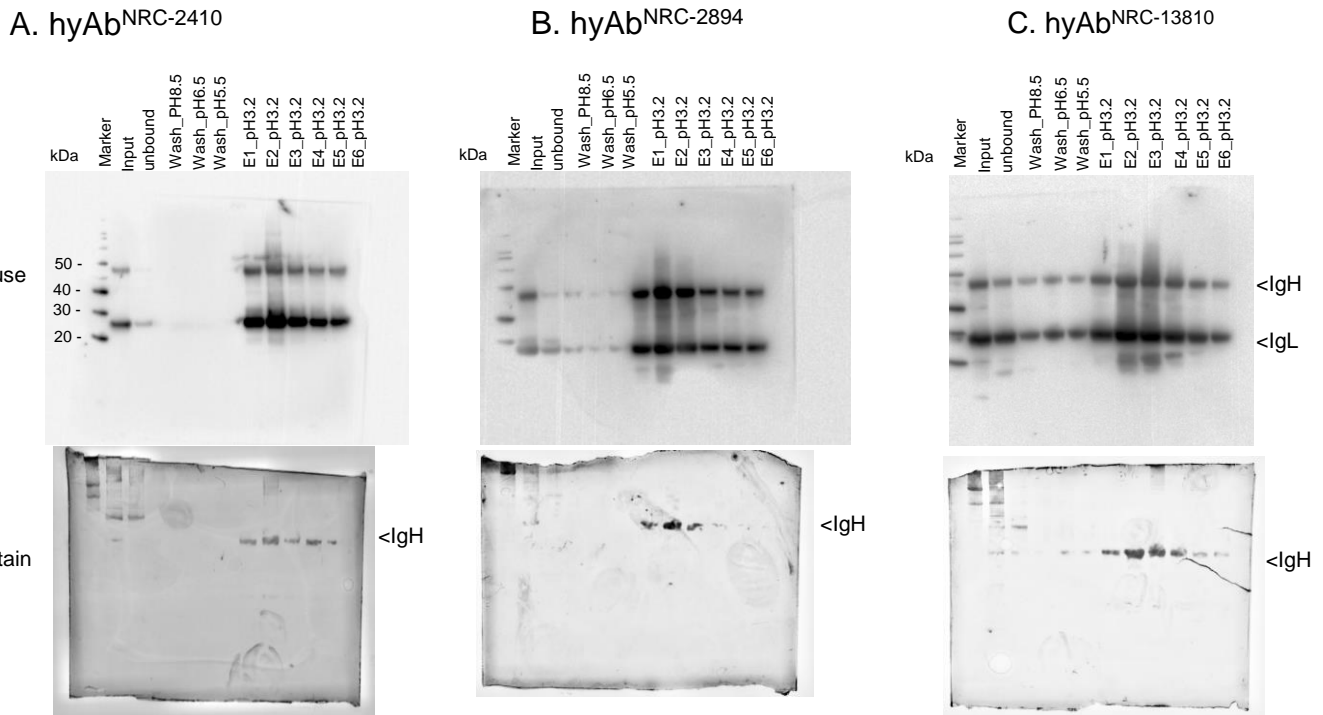

Top α-mouse IgG panel lists the blots developed by ECL and captured by Bio-Rad Image Lab 6.0 with adjustable brightness transformation. The image of the original blots is shown with higher saturated pixels than the final figures for an easy view of the gel boundary. Note that every image is from a whole, un-crop gel.

# Final Figure 4s-A

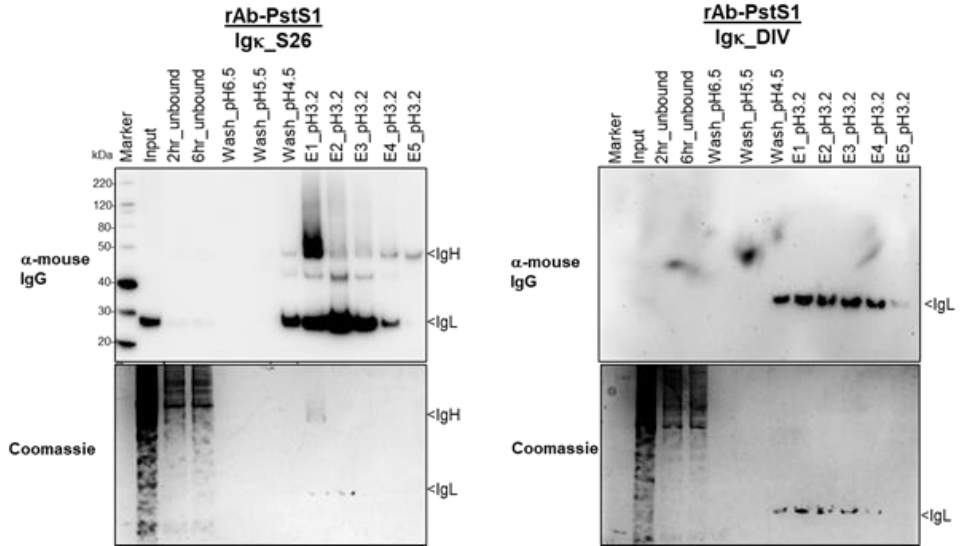

## Original gel/blot pictures

### rAb: PstS1 Igκ\_S26

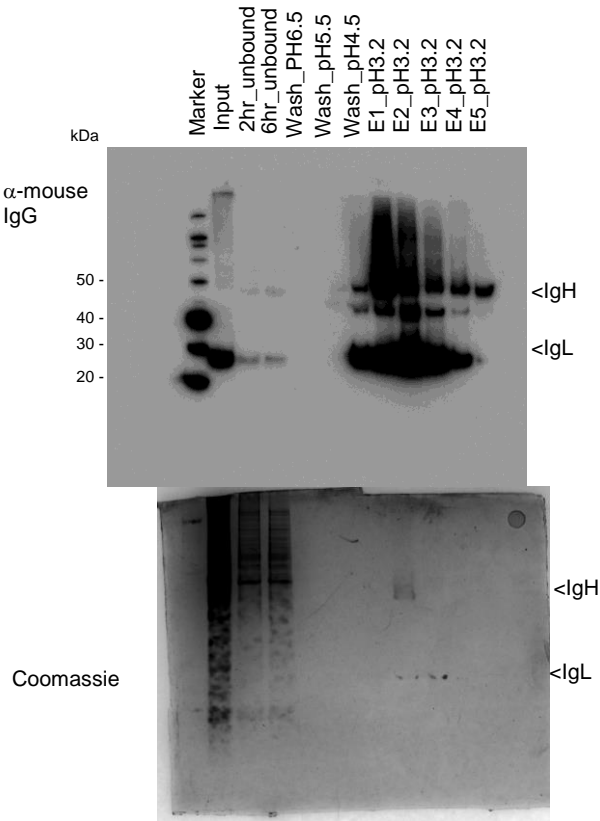

### rAb: PstS1 Igκ\_DIV

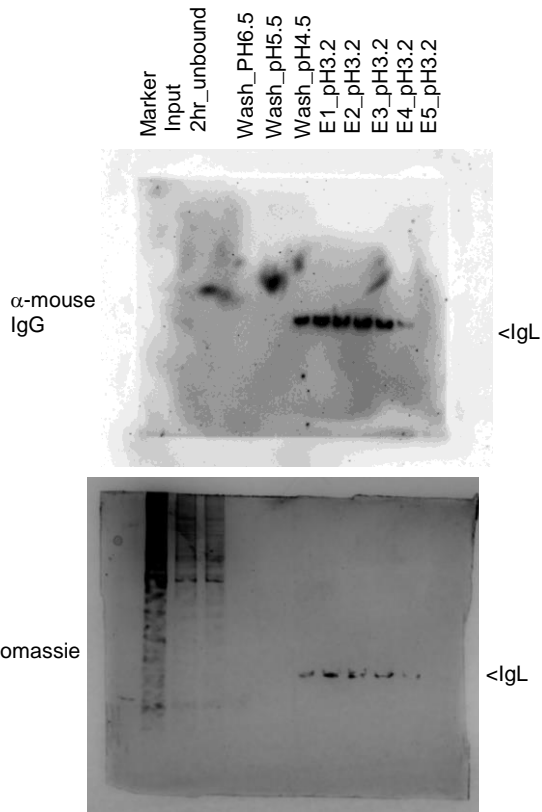

Top  $\alpha$ -mouse IgG panel lists the blots developed by ECL and captured by Bio-Rad Image Lab 6.0 with adjustable brightness transformation. The image of the original blots is shown with higher saturated pixels than the final figures for an easy view of the gel boundary. Note that every image is from a whole, un-crop gel.

# Final Figure 4s-B

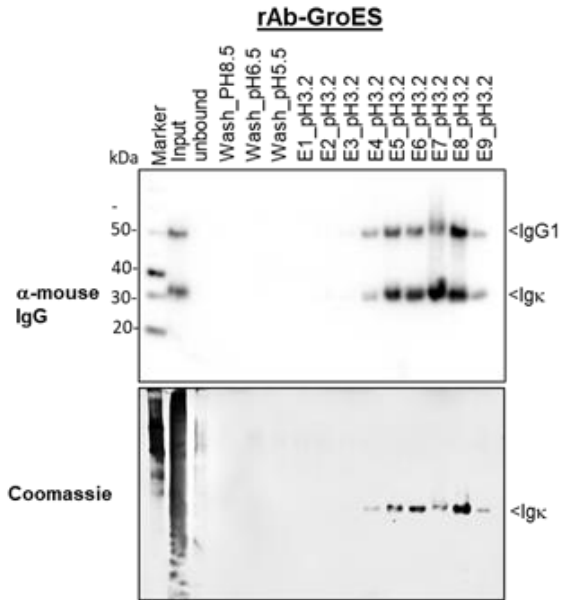

## Original gel/blot pictures

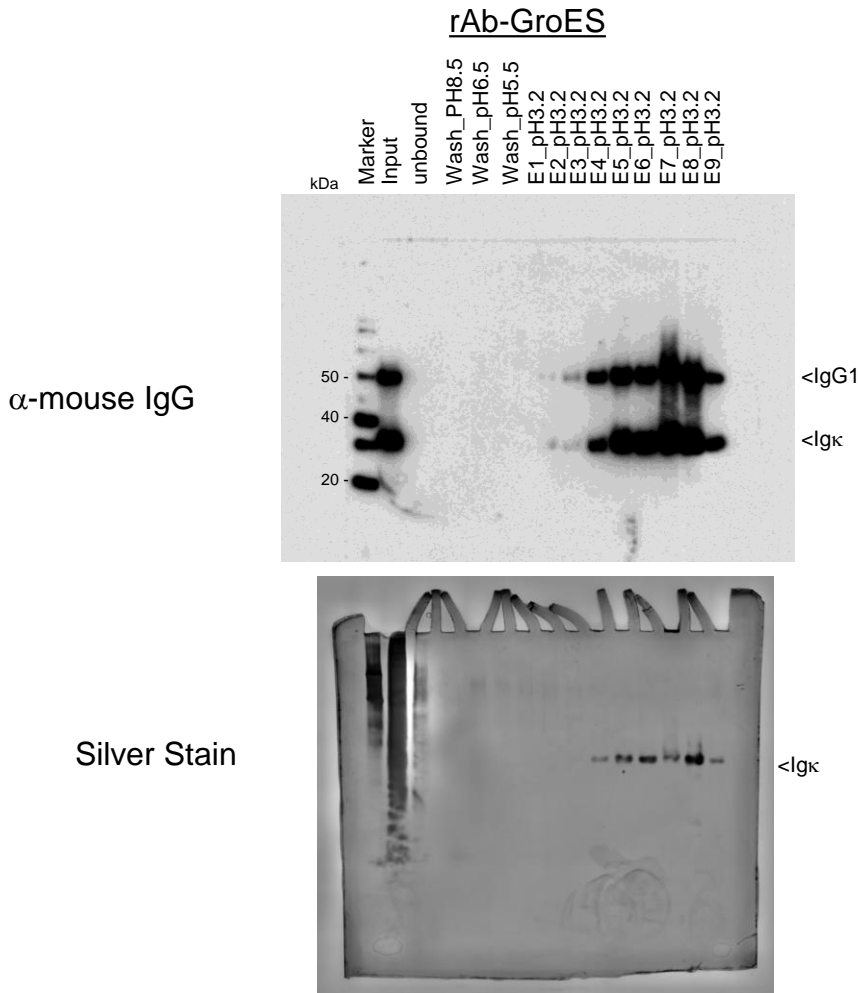

Top α-mouse IgG panel lists the blots developed by ECL and captured by Bio-Rad Image Lab 6.0 with adjustable brightness transformation. The image of the original blots is shown with higher saturated pixels than the final figures for an easy view of the gel boundary. Note that every image is from a whole, un-crop gel.

# Final Fig 4s-C

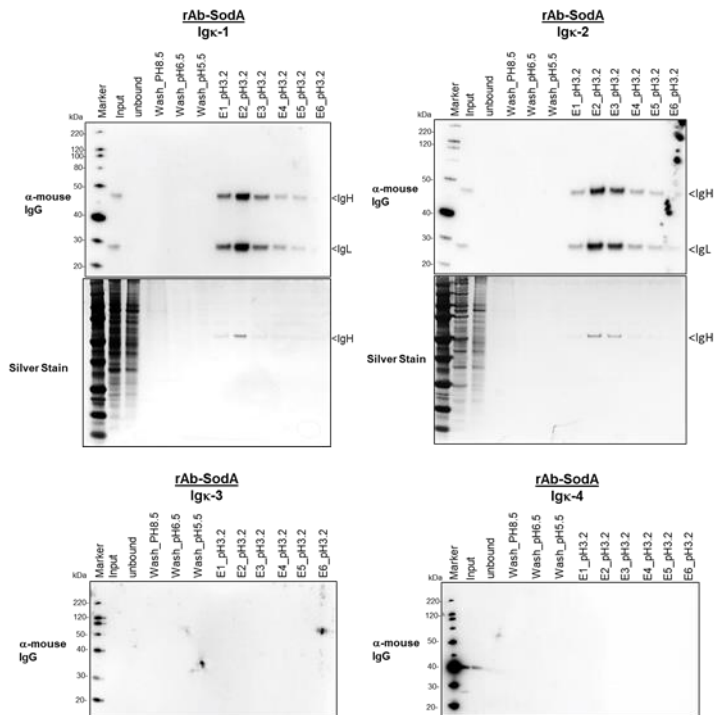

## Original gel pictures

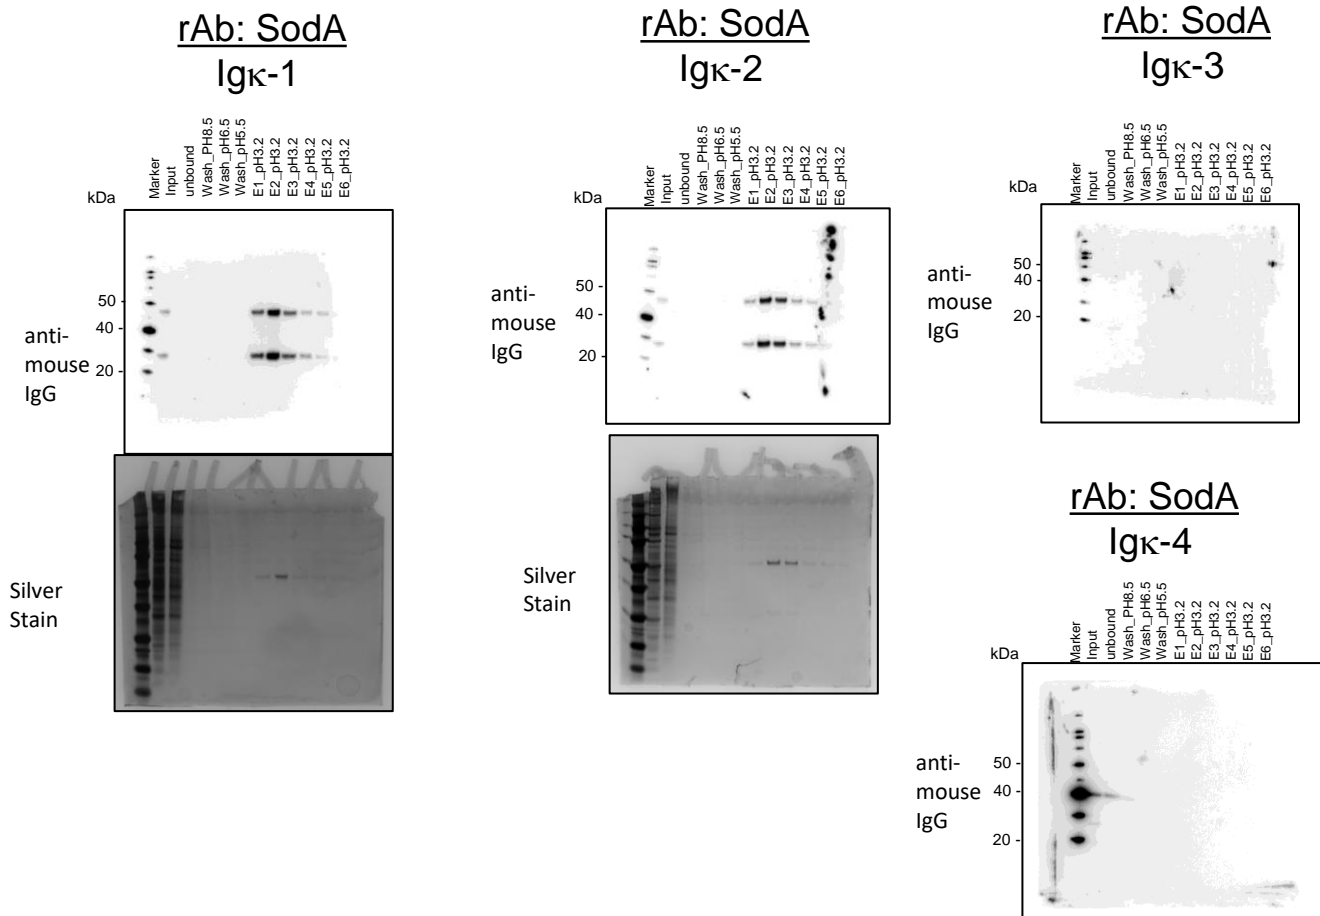

# Final Figure 4s-D

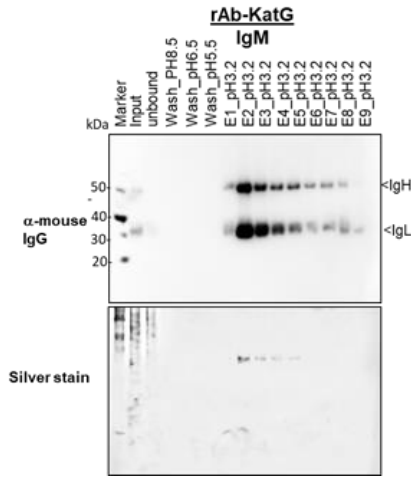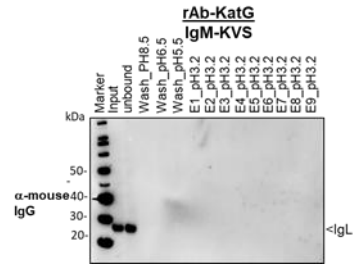

## Original gel/blot pictures

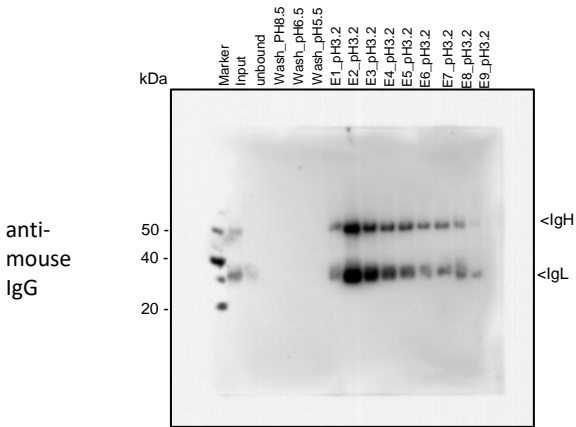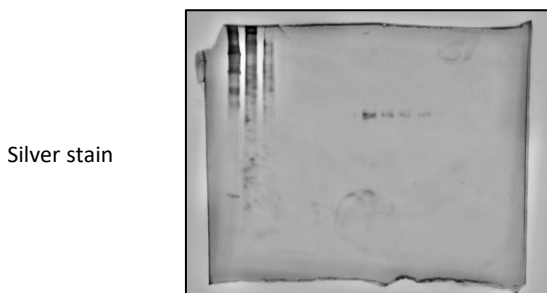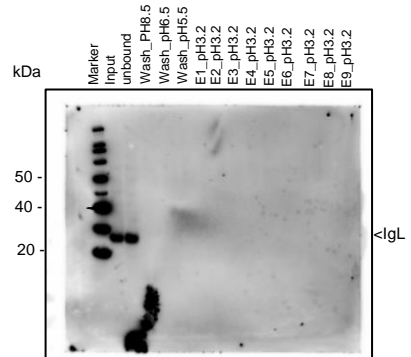

Top  $\alpha$ -mouse IgG panel lists the blots developed by ECL and captured by Bio-Rad Image Lab 6.0 with adjustable brightness transformation. The image of the original blots is shown with higher saturated pixels than the final figures for an easy view of the gel boundary. Note that every image is from a whole, un-crop gel.

# Final Figure 5s-A & B

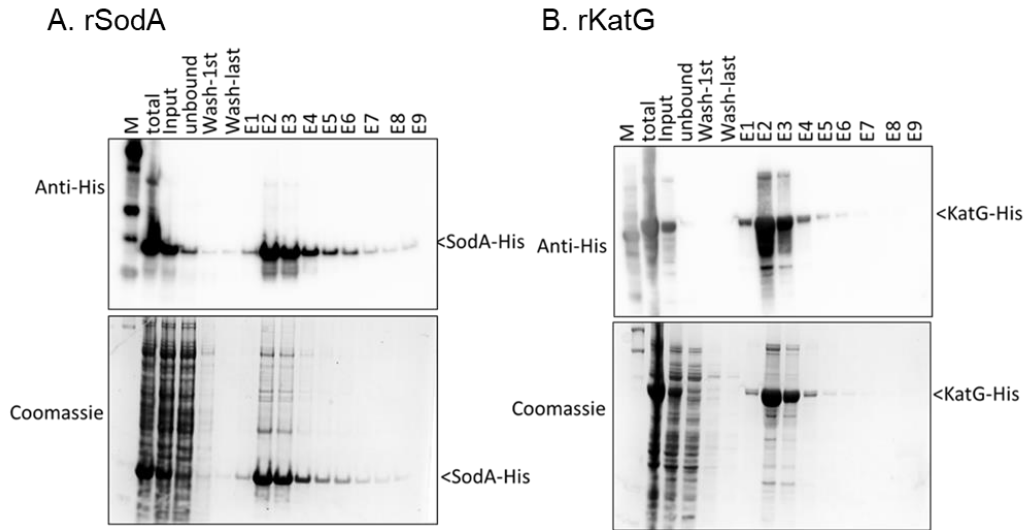

## Original gel/blot pictures

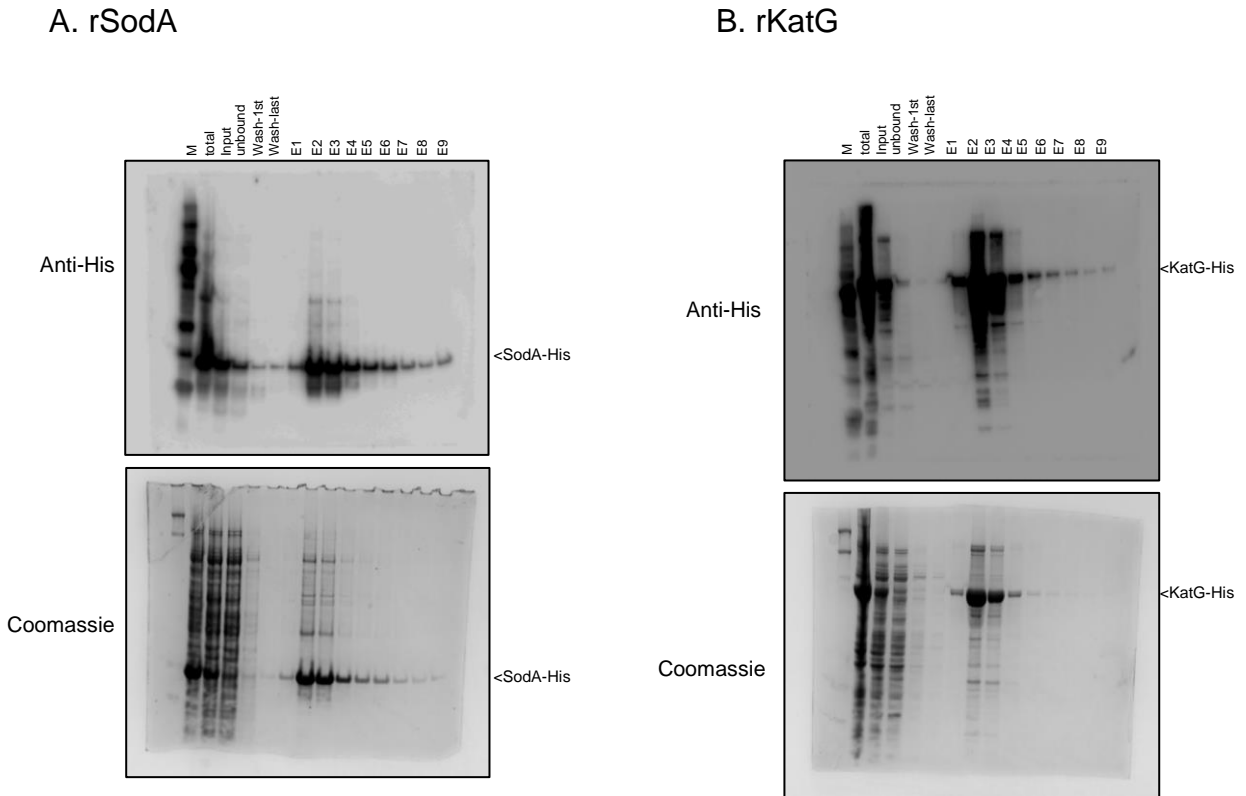

Top  $\alpha$ -mouse IgG panel lists the blots developed by ECL and captured by Bio-Rad Image Lab 6.0 with adjustable brightness transformation. The image of the original blots is shown with higher saturated pixels than the final figures for an easy view of the gel boundary. Note that every image is from a whole, un-crop gel.
